# Supplementary material for: Assessing the potential of metal oxide semiconducting gas sensors for illicit drug detection markers
Source: Royal Society of Chemistry journal article supplement (doi:10.1039/c4ta00357h), 2014-01-01
Supplement: c4ta00357h1.pdf [file c4ta00357h1.pdf]

ESI †

S1 – Raman spectroscopy of WO<sub>3</sub> and SnO<sub>2</sub> sensors before and after exposure to test gases. 'B' denotes before exposure and 'A' denotes after exposure.

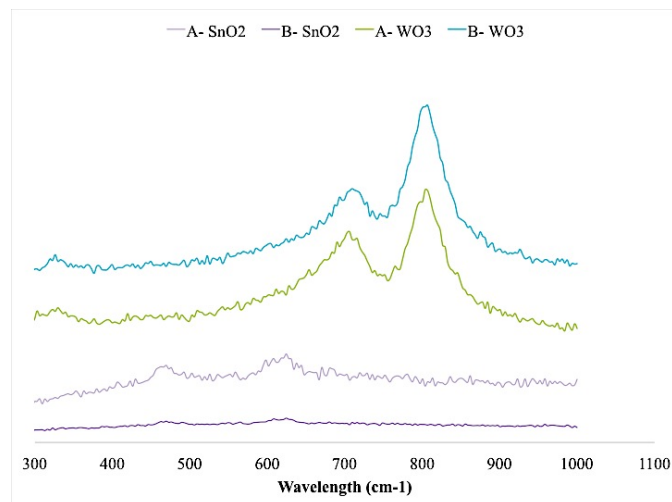

S2 - Elemental analysis of metal oxide sensors performed with EDX. Note that zeolite overlays mask the presence of both tungsten and tin. 'Y' refers to H-Y zeolite, 'ZSM' refers to H-ZSM-5 zeolite, 'over' refers to overlay and 'admix' refers to admixture.

| Sensor                      | W     | Atomic Percentage |       |       |      |
|-----------------------------|-------|-------------------|-------|-------|------|
|                             |       | Sn                | O     | Si    | Al   |
| SnO <sub>2</sub>            |       | 22.22             | 77.78 |       |      |
| WO <sub>3</sub>             | 25.09 |                   | 74.91 |       |      |
| WO <sub>3</sub> + Y over    | 7.58  |                   | 58.48 | 25.62 | 8.32 |
| WO <sub>3</sub> + ZSM over  | 0.69  |                   | 56.60 | 41.91 | 0.80 |
| SnO <sub>2</sub> + Y admix  |       | 30.54             | 61.65 | 5.80  | 2.00 |
| WO <sub>3</sub> + ZSM admix | 16.30 |                   | 64.94 | 18.23 | 0.52 |
